# Supplementary material for: Characterizing brain dynamics during ketamine-induced dissociation and subsequent interactions with propofol using human intracranial neurophysiology
Source: PubMed Central journal article supplement (PMC10060225; doi:10.1038/s41467-023-37463-3), 2023-03-29
Supplement: 41467_2023_37463_MOESM3_ESM.pdf [file 41467_2023_37463_MOESM3_ESM.pdf]

**File name: Supplementary Movie 1**

**Description:** 3-Dimensional view of intracranial electrodes from all subjects on Colin 27 brain template
